# Supplementary material for: A New Green Titania with Enhanced NIR Absorption for Mitochondria-Targeted Cancer Therapy
Source: PubMed Central journal article supplement — Theranostics. 2017 Apr 7;7(6):1531–42. doi: 10.7150/thno.17247 (PMC5436512; doi:10.7150/thno.17247), 2017-04-07
Supplement: thnov07p1531s1.pdf [file thnov07p1531s1.pdf]

## Supporting information

# A New Green Titania with Enhanced NIR Absorption for Mitochondria-Targeted Cancer Therapy

Juan Mou, Tianquan Lin, Fuqiang Huang, Jianlin Shi and Hangrong Chen✉

### Supplementary figures

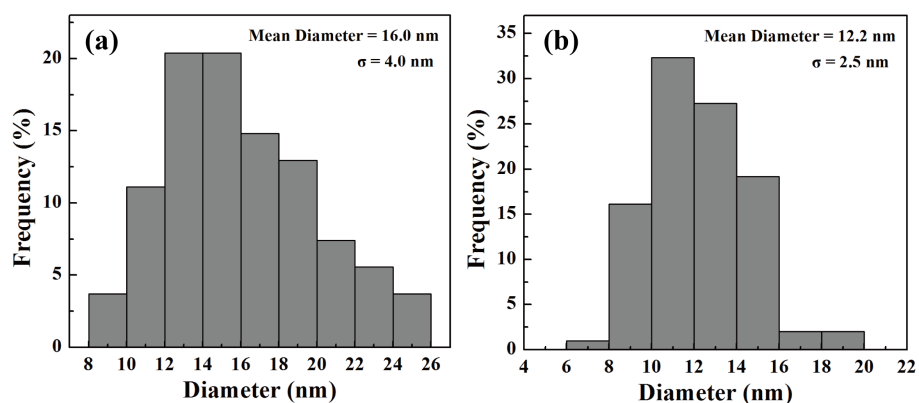

Figure S1. Nanocrystal size distribution histograms of  $B\text{-TiO}_{2-x}$  (a) and  $G\text{-TiO}_{2-x}$  (b).

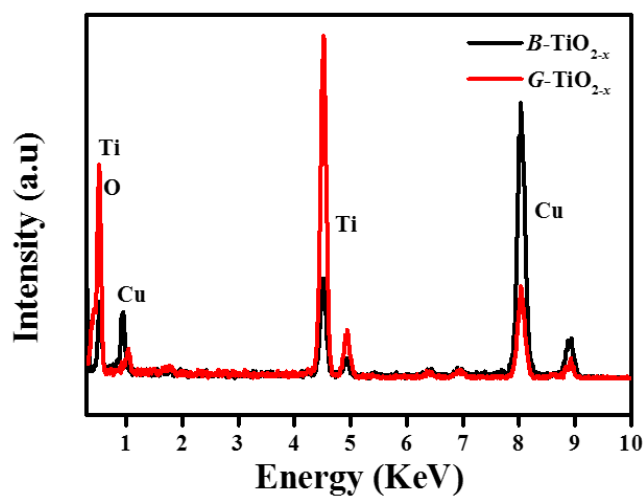

Figure S2. Energy dispersive X-ray spectrum of the as-synthesized  $B\text{-TiO}_{2-x}$  and  $G\text{-TiO}_{2-x}$ .

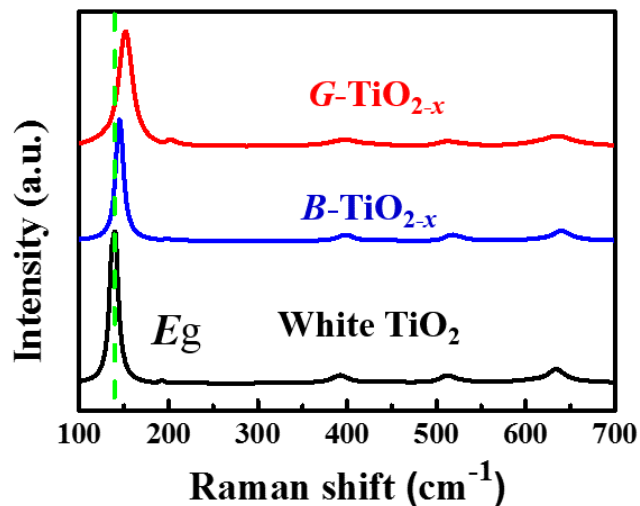

**Figure S3.** Raman spectra of white  $\text{TiO}_2$ , as-synthesized  $B\text{-TiO}_{2-x}$  and  $G\text{-TiO}_{2-x}$ .

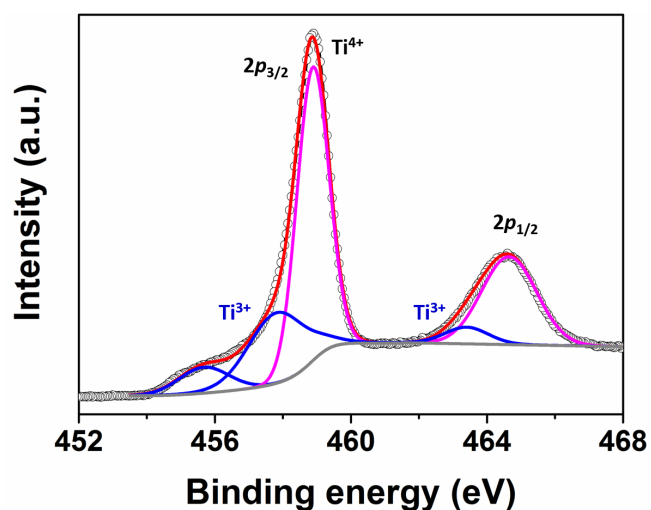

**Figure S4.** X-ray Photoelectron Spectroscopy spectra of the  $G\text{-TiO}_{2-x}$ . The shoulder peaks (in blue) at  $\sim 457$  eV in the  $\text{Ti } 2p_{3/2}$  and at  $463$  eV in  $\text{Ti } 2p_{1/2}$  XPS spectra are correlated with  $\text{Ti}^{3+}$  while the main peak (in magenta) at  $458.9$  and  $464.6$  eV corresponding to  $\text{Ti } 2p_{3/2}$  and  $\text{Ti } 2p_{1/2}$  of  $\text{Ti}^{4+}$ , respectively.

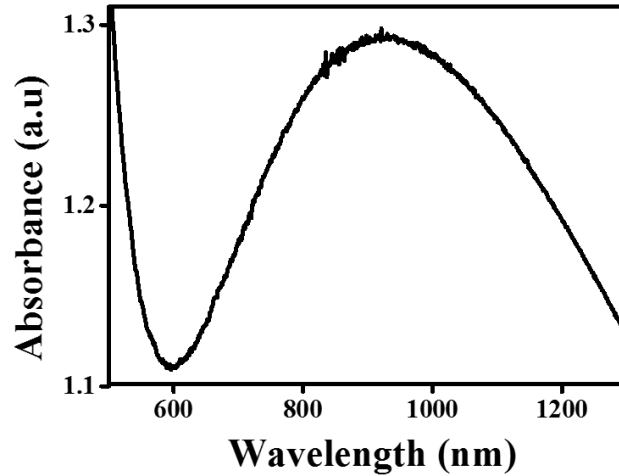

**Figure S5.** UV-vis absorbance spectrum of aqueous solutions containing  $G\text{-TiO}_{2-x}$  (Ti concentration: 50 ppm).

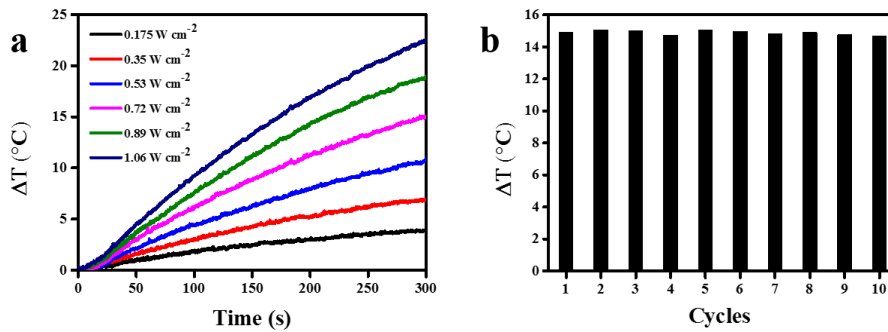

**Figure S6.** (a) Temperature elevation of the aqueous solution containing  $G\text{-TiO}_{2-x}$  at determined Ti concentration (2 mL, 50 ppm) as a function of irradiation time and power densities (980 nm). (b) Photothermal stability investigation after laser irradiation for 10 cycles (980 nm,  $0.72\text{ W cm}^{-2}$ , 5 min).

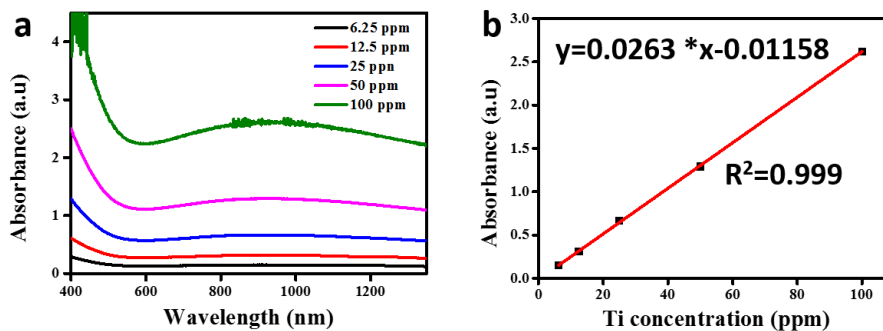

**Figure S7.** (a) UV-vis absorbance spectra of aqueous solutions containing  $G\text{-TiO}_{2-x}\text{-TPP}$  at varied concentrations and (b) the corresponding linear plot of absorbance vs concentrations at 920 nm.

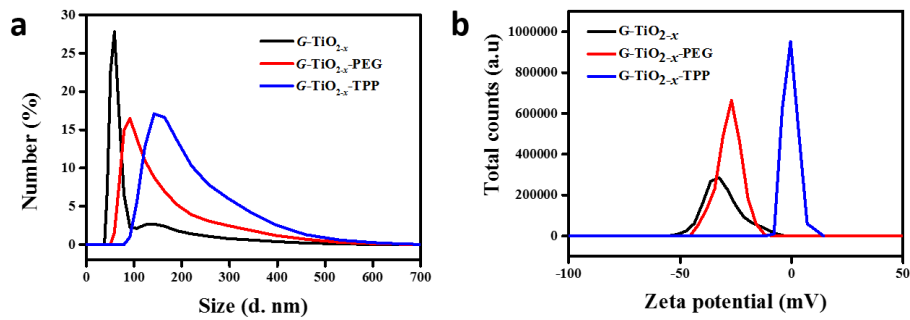

**Figure S8.** Hydrodynamic diameter distribution (a) and Zeta potential (b) of the as-synthesized  $G-TiO_{2-x}$  and after PEG, TPP modification.

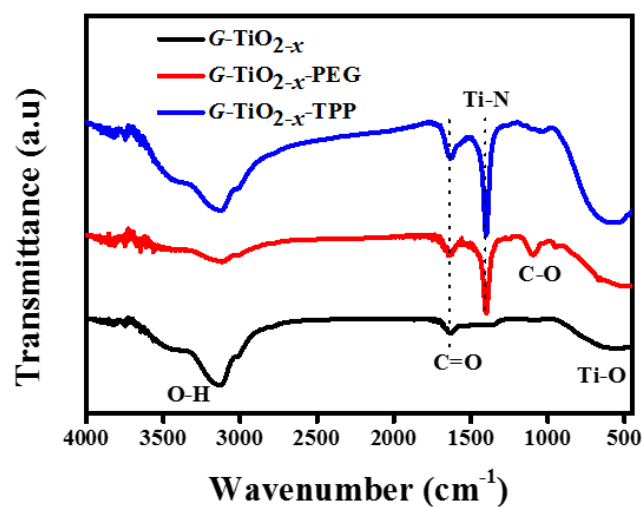

**Figure S9.** FT-IR spectra of the  $G-TiO_{2-x}$  and after PEG, TPP modification.

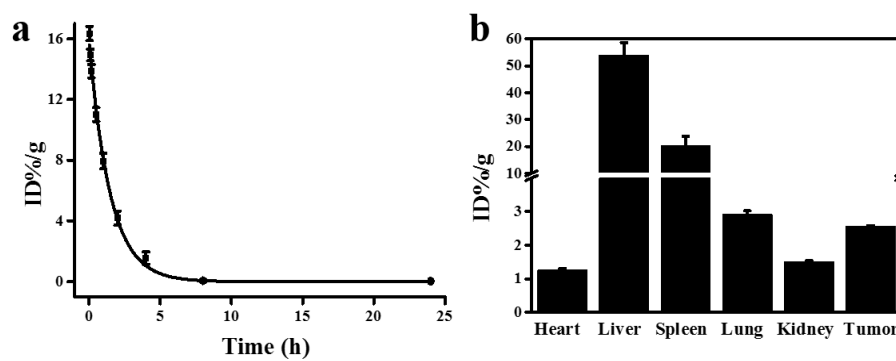

**Figure S10.** (a) Pharmacokinetic profile of  $G-TiO_{2-x}-TPP$  following intravenous administration. (b) Biodistribution of  $G-TiO_{2-x}-TPP$  at 24 h after intravenous injection in mice. Each experiment was repeated three times in triplicate. Data were shown as the means  $\pm$  SD.

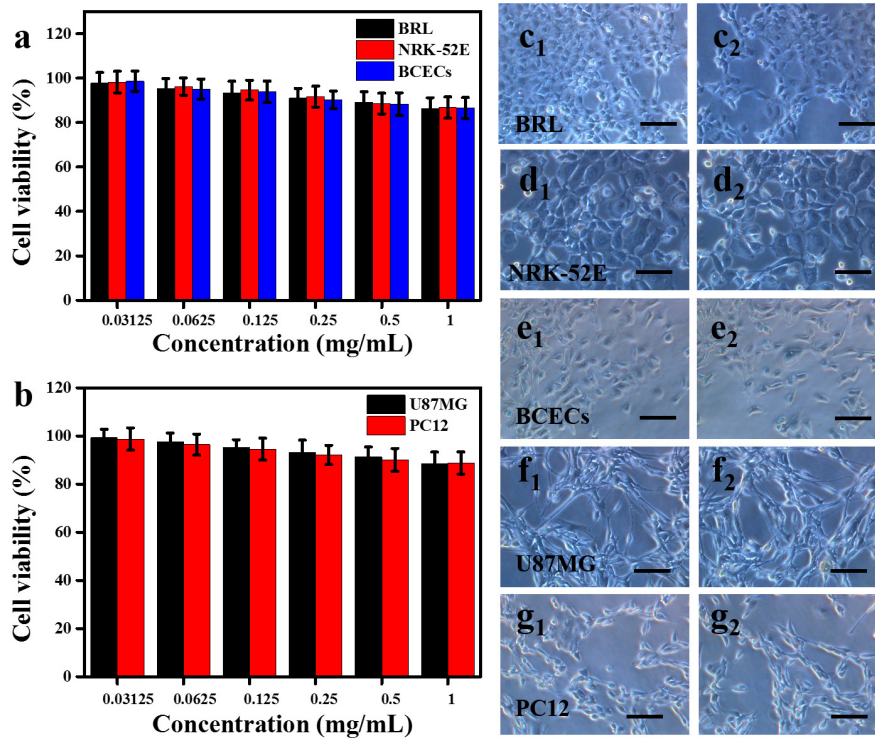

**Figure S11.** *In vitro* cell viabilities of three types of normal cells (BRL, NRK-52E, BCECs) and two types of brain-related cancer cells (U87MG and PC12) incubated with  $G\text{-TiO}_{2-x}\text{-TPP}$  at different concentrations for 24 h, evaluated by a standard MTT assay. Corresponding optical microscopic images of the *in vitro* cell morphology of five types of cells incubated without ( $c_1\text{-}g_1$ ) or with  $G\text{-TiO}_{2-x}\text{-TPP}$  ( $c_2\text{-}g_2$ ) (Ti concentration: 100 ppm) for 24 h. Each experiment was repeated three times in triplicate. Data were shown as the means  $\pm$  SD. All the scale bars in (c-g) are 100  $\mu\text{m}$ .

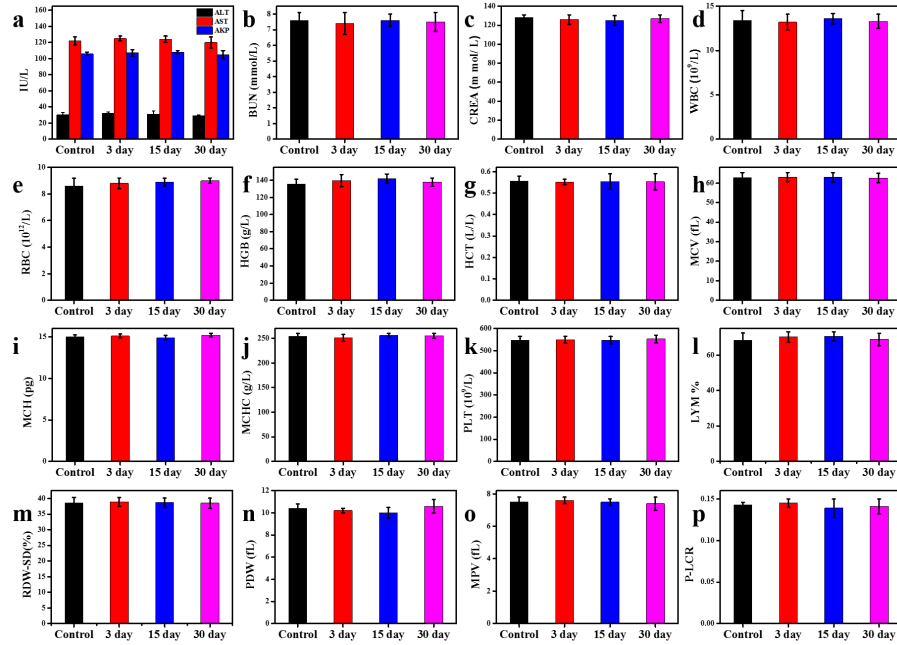

**Figure S12.** The variations of blood indexes of Kunming mice after intravenous injection of physiological saline (control) or  $G\text{-TiO}_{2-x}\text{-TPP}$  (8 mg Ti/kg) at different time points (*i.e.*, 0, 3, 15, 30 days). Each experiment was repeated three times in triplicate. Data were shown as the means  $\pm$  SD.

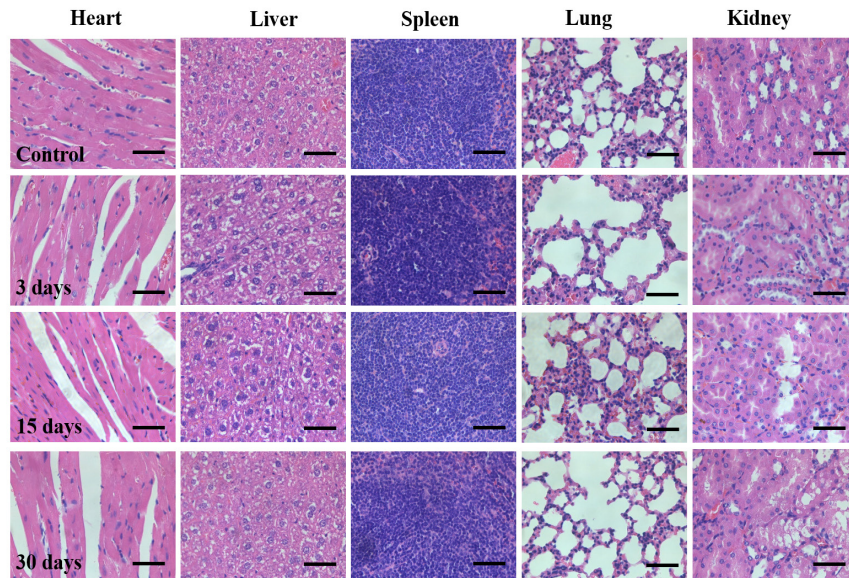

**Figure S13.** Time courses of histological changes in main organs of Kunming mice *via* H&E staining after intravenous injection of physiological saline (control) or  $G\text{-TiO}_{2-x}\text{-TPP}$  (8 mg Ti/kg) at different time points (*i.e.*, 0, 3, 15, 30 days). All the scale bars are 50  $\mu\text{m}$ .

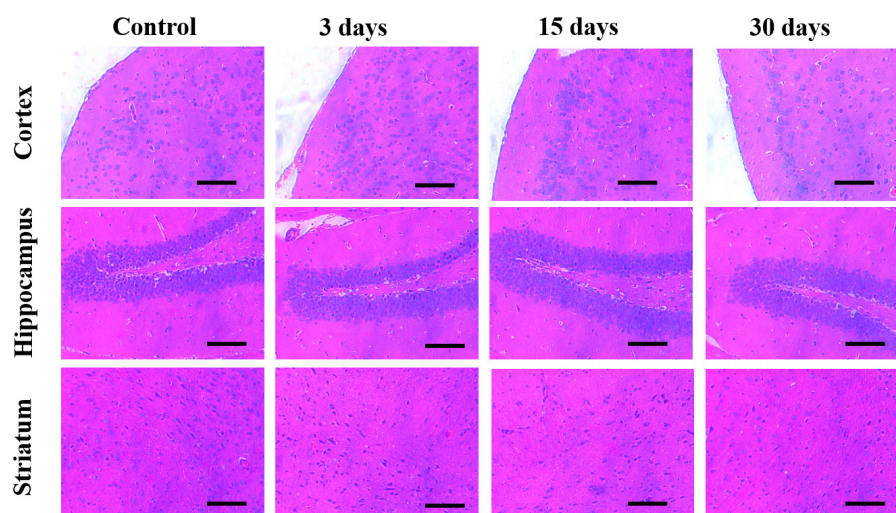

**Figure S14.** *In vivo* brain toxicity evaluation of  $G\text{-TiO}_{2-x}\text{-TPP}$ . H&E-stained main brain tissues sections of cortex, hippocampus and striatum, which were collected from mice treated with intravenous injection of physiological saline (control) or  $G\text{-TiO}_{2-x}\text{-TPP}$  (8 mg Ti/kg) at different time points (*i.e.*, 0, 3, 15, 30 days), to monitor the histological changes. All the scale bars are 50  $\mu\text{m}$ .
